# Supplementary material for: A nonalcoholic fatty liver disease model in human induced pluripotent stem cell-derived hepatocytes, created by endoplasmic reticulum stress-induced steatosis
Source: PubMed Central journal article supplement (PMC6176998; doi:10.1242/dmm.033530), 2018-09-25
Supplement: dmm-11-033530-s1.pdf [file dmm-11-033530-s1.pdf]

**Table S1.** Genes used in the RT-qPCR analysis and their corresponding TaqMan gene expression assay IDs

| Gene                           | Assay ID      | Exon Boundary Range | Amplicon Length |
|--------------------------------|---------------|---------------------|-----------------|
| <i>ATF6</i>                    | Hs00232586_m1 | 6-7                 | 95              |
| <i>ATF4</i>                    | Hs00909569_g1 | 1-4                 | 68              |
| <i>PERK</i>                    | Hs00984006_m1 | 3-4                 | 83              |
| <i>XBP1s</i>                   | Hs00231936_m1 | 3-4                 | 60              |
| <i>CHOP</i>                    | Hs00358796_g1 | 2-4                 | 93              |
| <i>STC2</i>                    | Hs01063215_m1 | 3-4                 | 93              |
| <i>EIF2<math>\alpha</math></i> | Hs00230684_m1 | 8-11                | 106             |
| <i>SRBP1c</i>                  | Hs01088691_m1 | 6-7                 | 90              |
| <i>ACC1</i>                    | Hs01046047_m1 | 29-33               | 65              |
| <i>SCD1</i>                    | Hs01682761_m1 | 2-3                 | 129             |
| <i>FASN</i>                    | Hs01005622_m1 | 3-4                 | 62              |
| <i>PLIN2</i>                   | Hs00605340_m1 | 5-7                 | 139             |
| <i>ApoB</i>                    | Hs00181142_m1 | 20-21               | 69              |
| <i>FAT-CD36</i>                | Hs00354519_m1 | 3-5                 | 83              |
| <i>FATP1</i>                   | Hs01587911_m1 | 11-12               | 120             |
| <i>FGF19</i>                   | Hs00192780_m1 | 2-3                 | 54              |
| <i>FGF21</i>                   | Hs00173927_m1 | 3-4                 | 117             |
| <i>CPT1<math>\alpha</math></i> | Hs00912671_m1 | 11-12               | 75              |
| <i>ACADM</i>                   | Hs00936584_m1 | 5-10                | 98              |
| <i>SHP</i>                     | Hs00222677_m1 | 1-2                 | 87              |
| <i>VLDLR</i>                   | Hs01045922_m1 | 16-19               | 98              |
| <i>FXR</i>                     | Hs01026590_m1 | 11-12               | 78              |
| <i>PPAR<math>\alpha</math></i> | Hs00947536_m1 | 4-6                 | 62              |
| <i>PPAR<math>\beta</math></i>  | Hs04187066_g1 | 5-8                 | 69              |
| <i>PPAR<math>\gamma</math></i> | Hs01115513_m1 | 4-6                 | 90              |
| <i>LXR</i>                     | Hs00172885_m1 | 6-8                 | 78              |
| <i>VDR</i>                     | Hs00172113_m1 | 2-4                 | 62              |

**Table S2.** Gene set validated from a MEDLINE search

| ER Branch      | Gene            | TG/FA vs BSA   |                                                       | Description                                                                                     | References                                                                            |                                 |
|----------------|-----------------|----------------|-------------------------------------------------------|-------------------------------------------------------------------------------------------------|---------------------------------------------------------------------------------------|---------------------------------|
|                |                 | Fold change    | q-value                                               |                                                                                                 |                                                                                       |                                 |
| <b>PERK</b>    | <i>IGFBP1</i>   | 8              | 6.5E-17                                               | Insulin-like growth factor (IGF)-binding protein-1                                              | J Biol Chem.2006 14;281(28):19124-33.                                                 |                                 |
|                | <i>LAMP3</i>    | 6.7            | 5.8E-12                                               | Lysosomal associated membrane protein 3                                                         | Breast Cancer Res. 2013; 15(1):R2                                                     |                                 |
|                | <i>TREM1</i>    | 6.4            | 1.4E-10                                               | Triggering receptor expressed on myeloid cells 1                                                | Brain Behav Immun. 2011; 25(6):1162-9                                                 |                                 |
|                | <i>STC2</i>     | 6.1            | 4.4E-11                                               | Calcium- and phosphate-regulating hormone                                                       | Mol Cell Biol. 2004; 24(21):9456-9469.                                                |                                 |
|                | <i>CHAC1</i>    | 5.6            | 3.7E-9                                                | Cation-transport regulator homolog 1                                                            | J Biol Chem. 2015; 290(25):15878-91.                                                  |                                 |
|                | <i>S100P</i>    | 5.8            | 4.6E-10                                               | S100 Calcium Binding Protein P                                                                  | J Biol Chem. 2009;284(7):4158-67.                                                     |                                 |
|                | <i>SLC7A11</i>  | 4.8            | 7.5E-8                                                | Solute carrier family 7/member 11 (Cystine/glutamate antiporter)                                | J Biol Chem. 2009;284(2):1106-15                                                      |                                 |
|                | <i>ASNS</i>     | 3.9            | 1.7E-5                                                | Asparagine synthetase                                                                           | Mol Biol Cell. 2016; 27(9): 1536-1551.                                                |                                 |
|                | <i>DDIT4</i>    | 3.8            | 2.9E-5                                                | DNA-damage-inducible transcript 4/REDD1                                                         | Mol Biol Cell. 2016; 27(9):1536-51; Biochem Biophys Res Commun. 2012; 427(3): 485-489 |                                 |
|                | <i>TRIB3</i>    | 3.6            | 8.7E-5                                                | Tribbles Pseudokinase 3                                                                         | EMBO J. 2005; 24(6): 1243-1255.                                                       |                                 |
|                | <i>WARS</i>     | 3.7            | 4.2E-5                                                | Aminoacyl tRNA-synthetases                                                                      | Nat Cell Biol. 2013; 15(5): 481-490.                                                  |                                 |
|                | <i>EIF4EBP1</i> | 3.4            | 0.0002                                                | Eukaryotic translation initiation factor 4E-binding protein 1                                   | Cell Metab. 2008; 7(3):269-76                                                         |                                 |
|                | <i>CHOP</i>     | 3              | 0.002                                                 | C/EBP homologous protein (CHOP)/growth arrest and DNA damage-inducible gene 153 (GADD153)/DDIT3 | J Lipid Res. 2016; 57(8):1329-38.                                                     |                                 |
|                | <i>CTH</i>      | 2.5            | 0.02                                                  | Cystathionine $\gamma$ -lyase                                                                   | Mol Biol Cell. 2016; 27(9): 1536-1551.                                                |                                 |
|                | <i>XPOT</i>     | 2.4            | 0.02                                                  | Exportin for tRNA                                                                               |                                                                                       |                                 |
| <b>XBP1s</b>   | <i>HSPA13</i>   | 2.3            | 0.05                                                  | heat shock protein family A (Hsp70) member 13/STCH                                              | Physiol Genomics. 2009; 38(3):328-41                                                  |                                 |
|                | <i>AGR2</i>     | 5.1            | 4.3E-8                                                | Anterior gradient 2, protein disulphide isomerase family member                                 | J Biol Chem. 2011; 286(52): 44855-44868                                               |                                 |
|                | <i>FICD</i>     | 3              | 0.002                                                 | FIC domain containing/Hype                                                                      | J Biol Chem 2015; 290(13): 8482-8499                                                  |                                 |
|                | <i>NUCB2</i>    | 2.9            | 0.004                                                 | Nucleobindin 2                                                                                  | FEBS Letters. 2006; 580(1):184-190                                                    |                                 |
|                | <i>DNAJB9</i>   | 2.7            | 0.007                                                 | DnaJ heat shock protein family (Hsp40) member B9/ERdj4                                          | Cell Rep. 2013;3(4):1279-92                                                           |                                 |
|                | <i>ERO1B</i>    | 2.5            | 0.02                                                  | Endoplasmic reticulum oxidoreductase 1 beta                                                     | Cell Rep. 2013;3(4):1279-92                                                           |                                 |
|                | <i>SEC11C</i>   | 2.3            | 0.04                                                  | SEC11 homolog C, signal peptidase complex subunit                                               | Cell Metab. 2012;16(4):487-99.                                                        |                                 |
|                | <i>DNAJC10</i>  | 2.3            | 0.05                                                  | DnaJ heat shock protein family (Hsp40) member C10/ERdj5                                         | Nat Immunol. 2014; 15(3):248-57                                                       |                                 |
|                | <b>ATF6</b>     | <i>DERL3</i>   | 5.7                                                   | 6.4E-9                                                                                          | Derlin 3                                                                              | Dev Cell. 2008 Dec;15(6):829-40 |
|                |                 | <i>DNAJC12</i> | 4.2                                                   | 4.3E-6                                                                                          | DnaJ heat shock protein family (Hsp40) member C12/DP1                                 |                                 |
| <i>CRELD2</i>  |                 | 3.2            | 0.0006                                                | Cysteine rich with EGF like domains 2                                                           | Biochem Biophys Res Commun. 2009;387(3):504-10.                                       |                                 |
| <i>HYOU1</i>   |                 | 3.2            | 0.0007                                                | Hypoxia up-regulated 1/GRP170                                                                   | Cell Struct Funct. 2008; 33(1):75-89                                                  |                                 |
| <i>PDIA4</i>   |                 | 2.7            | 0.008                                                 | Protein disulfide isomerase family A, member 4; chaperone activity/Erp72                        | Cell Rep. 2013; 3(4): 1279-1292.                                                      |                                 |
| <i>HSP90B1</i> |                 | 2.7            | 0.009                                                 | heat shock protein 90 beta family member 1/GRP94                                                | J Biol Chem. 2011; 286(52):44855-68                                                   |                                 |
| <i>HSPA5</i>   |                 | 2.6            | 0.01                                                  | Heat shock protein family A (Hsp70) member 5/GRP78/Bip                                          | Mol Cell Biol. 2005; 25(11):4529-40; Mol Biol Cell. 2016; 27(9): 1536-1551            |                                 |
| <i>MANF</i>    |                 | 2.4            | 0.02                                                  | Mesencephalic astrocyte derived neurotrophic factor/ARP                                         | Circ Res. 2008; 103(11):1249-58.                                                      |                                 |
| <i>DNAJB11</i> |                 | 2.5            | 0.02                                                  | DnaJ heat shock protein family (Hsp40) member B11/ERdj3                                         | Cell Rep. 2013;3(4):1279-92                                                           |                                 |
| <i>HERPUD1</i> |                 | 2.4            | 0.03                                                  | Homocysteine inducible ER protein with ubiquitin like domain 1                                  | Cell Rep. 2013;3(4):1279-92.                                                          |                                 |
| <i>CRELD1</i>  | 2.4             | 0.03           | Cysteine rich with EGF like domains 1/ AVSD2; CIRRIIN | Elife. 2014 ;3:e01694 Biochem Biophys Res Commun. 2009; 387(3):504-10                           |                                                                                       |                                 |

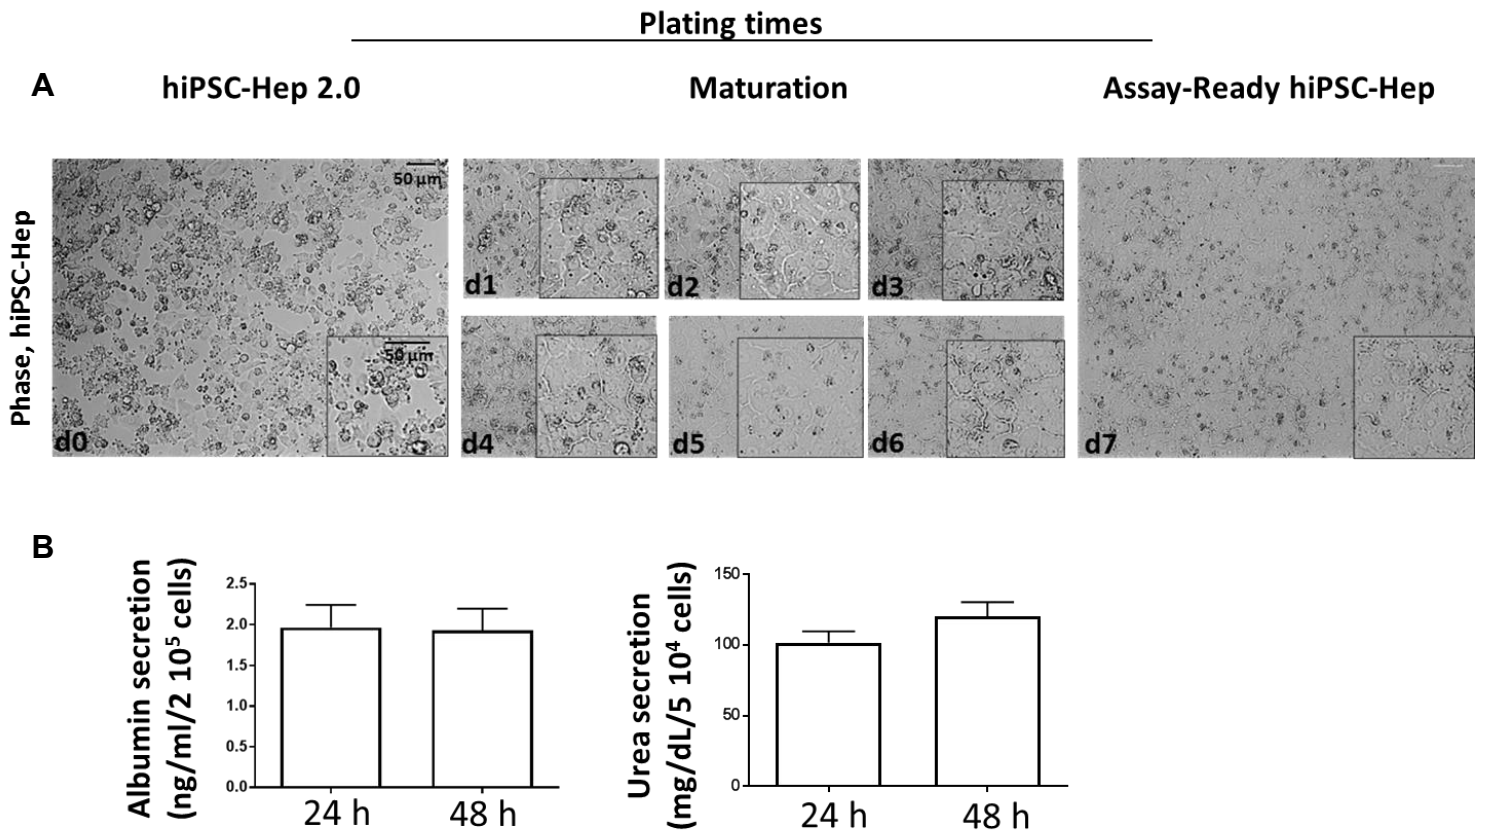

**Figure S1. Morphological and functional characterization of hiPSC-Hep.** (A) Representative light microscopy images of the cell morphology at different stages of maturation post thaw (day 0 to 7). (B) Albumin and urea secretion into the medium per number of cells as measured by ELISA at 24 and 48 h after day 9. Data are mean±s.d for three experimental determinations.

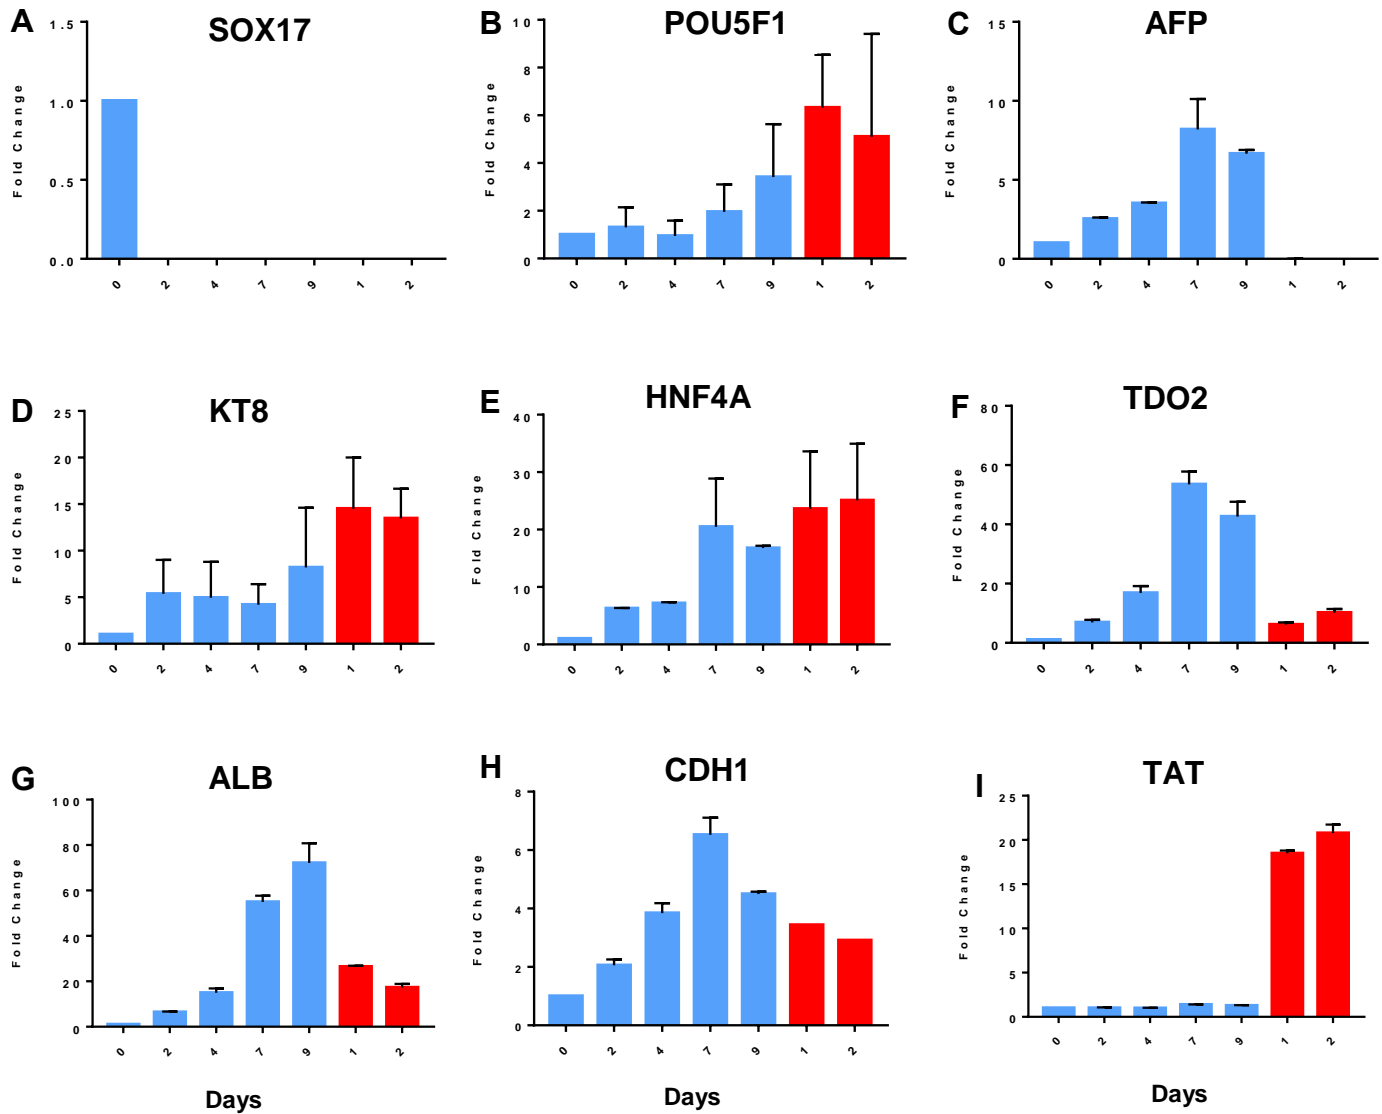

**Figure S2. Expression levels of genes associated with hepatic maturation.** The reference genes were selected as endogenous control genes to assess the hiPSC-Hep (blue bars) hepatic maturation status in comparison with primary human hepatocytes (red bars). The x-axis represents the time (in days) in culture during hepatic maturation. The y-axis represents the fold change values from the RT-qPCR TaqMan analysis. Data are mean  $\pm$  s.d for two experimental determinations, each performed with triplicate replicates.

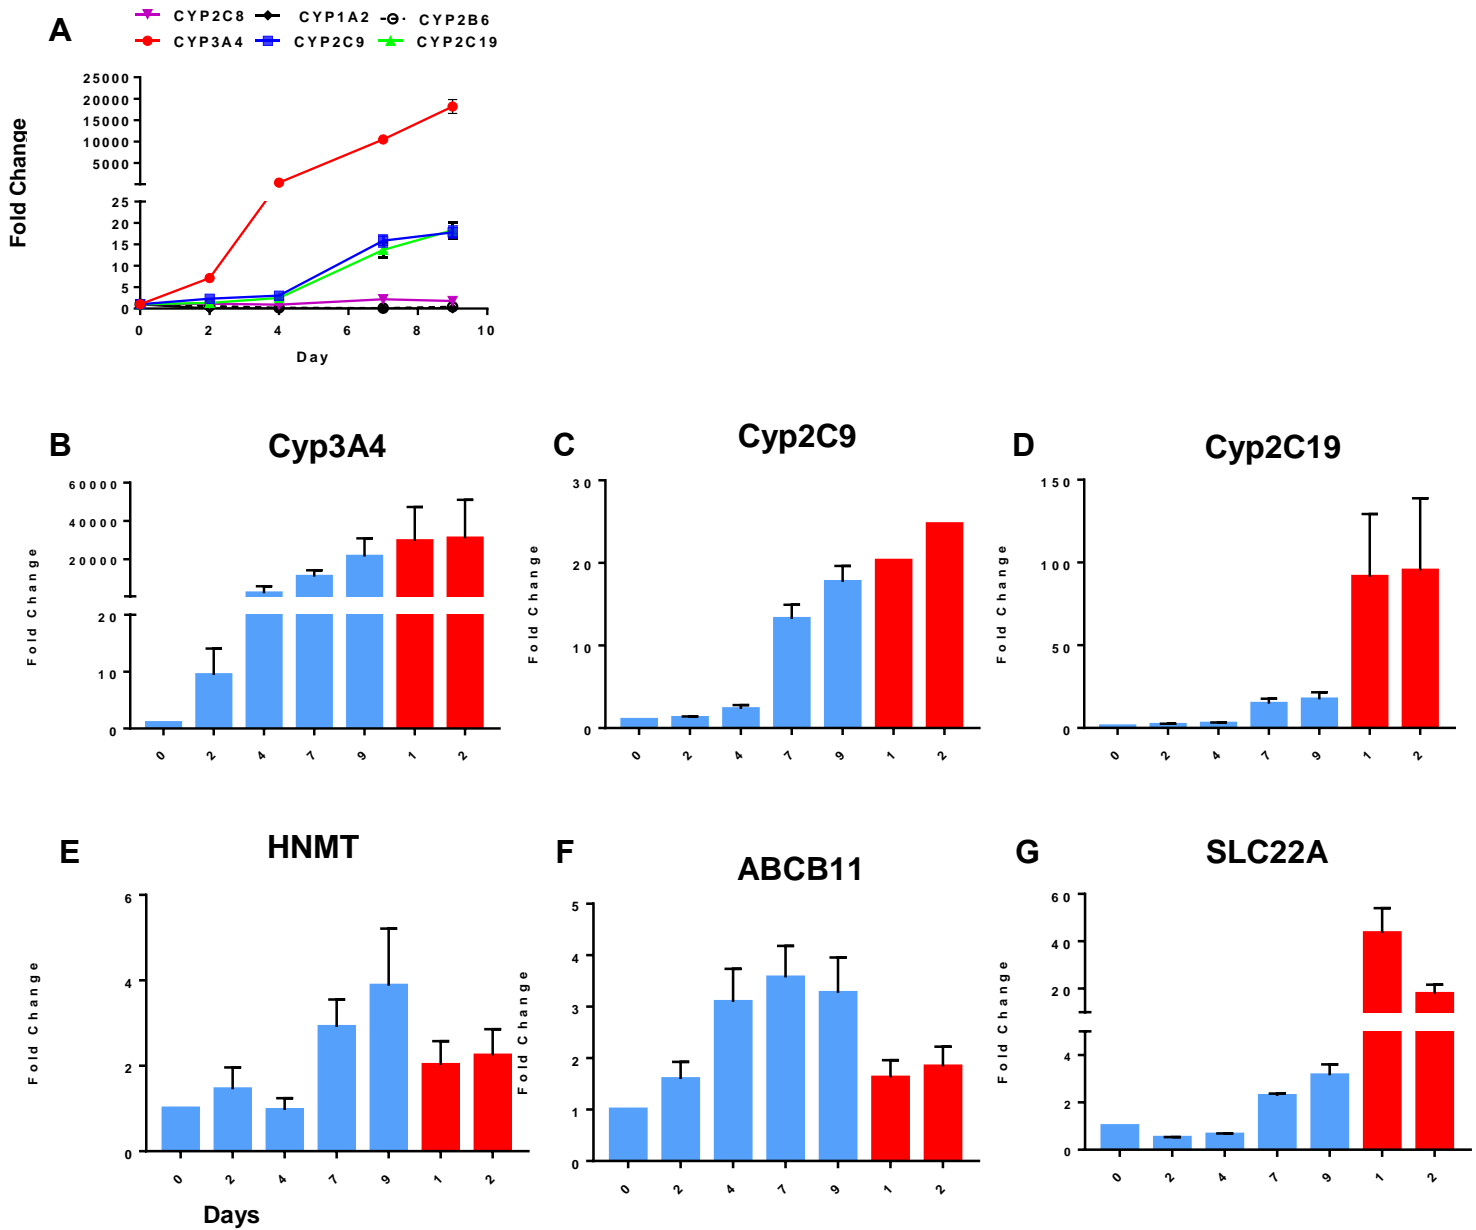

**Figure S3. Time-dependent changes in gene expression for phase I, II and III metabolism genes.** (A) The time course for cytochrome P450 enzymes in the hiPSC-Hep. (B-G) The reference genes were selected as endogenous control genes to hiPSC-Hep (blue bars) hepatic maturation status in comparison with primary human hepatocytes (red bars). The x-axis represents the time (in days) in culture during hepatic maturation. The y-axis represents the fold change values from the RT-qPCR TaqMan analysis. Data are mean  $\pm$  s.d for two experimental determinations, each performed with triplicate replicates.

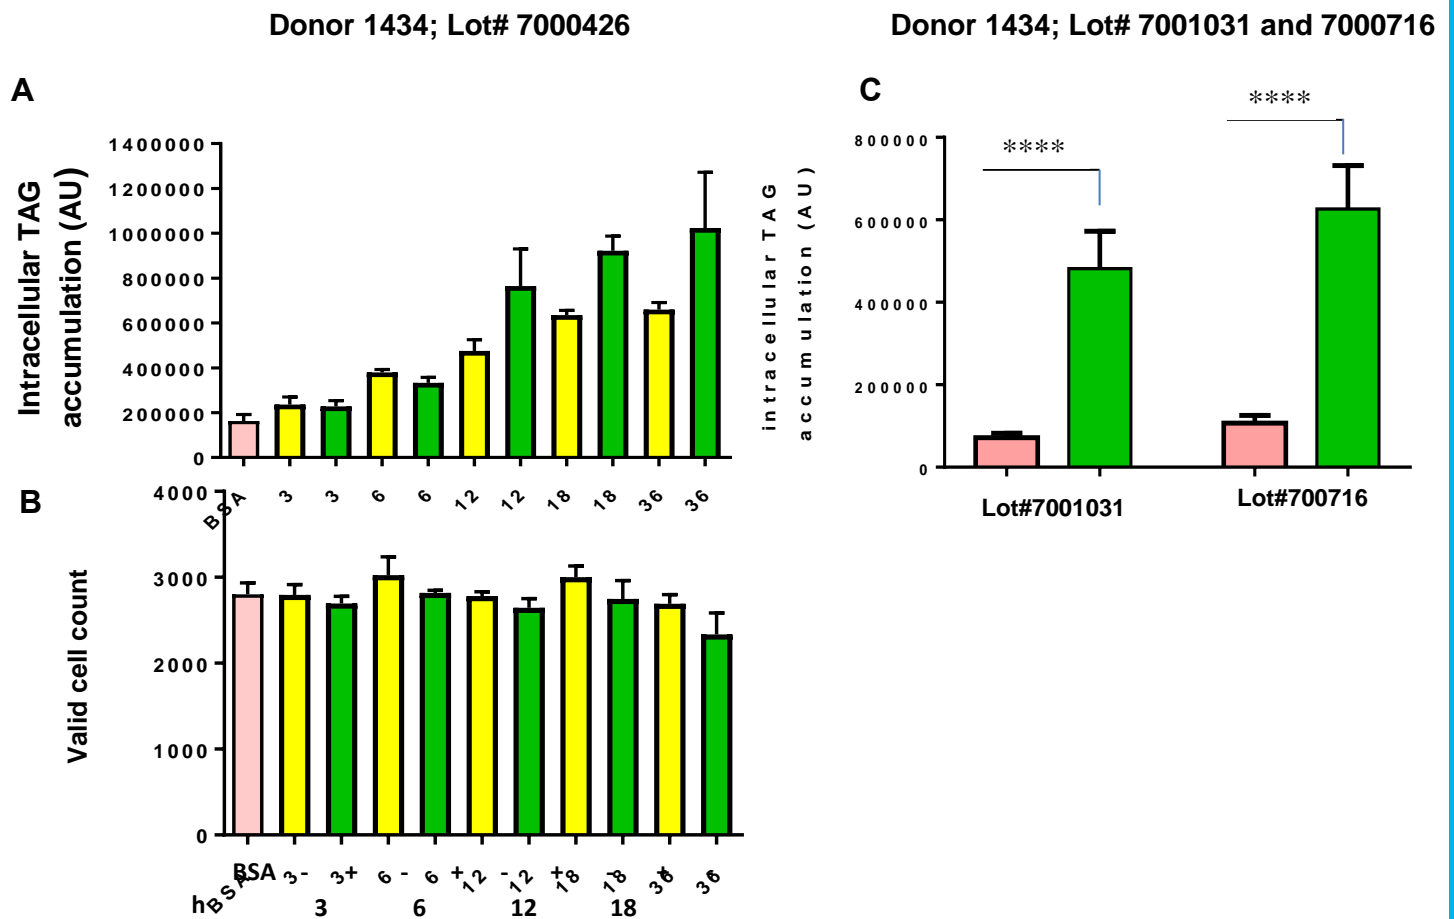

**Figure S4. Lipid accumulation for unique lots of iPSC-Hep.** (A) Intracellular lipid accumulates in the presence of 25  $\mu$ M oleic acid and 200 $\mu$ M palmitic acid alone (yellow bars) or in combination with 1 $\mu$ M Thapsigargin (green bars) over the time course compared to BSA-treated hiPSC-Hep (pink bar) and is maximal between 12 to 36 h as determined by high-content analysis and shown in Fig 1 and described in Materials and Methods. (B) Treatments in (A) had no adverse effect on valid cell count. Data are mean $\pm$ s.d for three experimental determinations, each determined from the average of three wells and seven fields per well. (C) Different lots of the hiPSC-Hep donor line 1434 shows reproducible lipid accumulation change between BSA-treated hiPSC-Hep (pink bar) and hiPSC-Hep treated with 25  $\mu$ M oleic acid, 200 $\mu$ M palmitic acid and 1 $\mu$ M Thapsigargin mix (green bars) across a 384w plate. Data are mean $\pm$ s.d for 32 biological determinations, each determined from the average of three wells and three fields per well. \*\*\*\* P<0.0001.

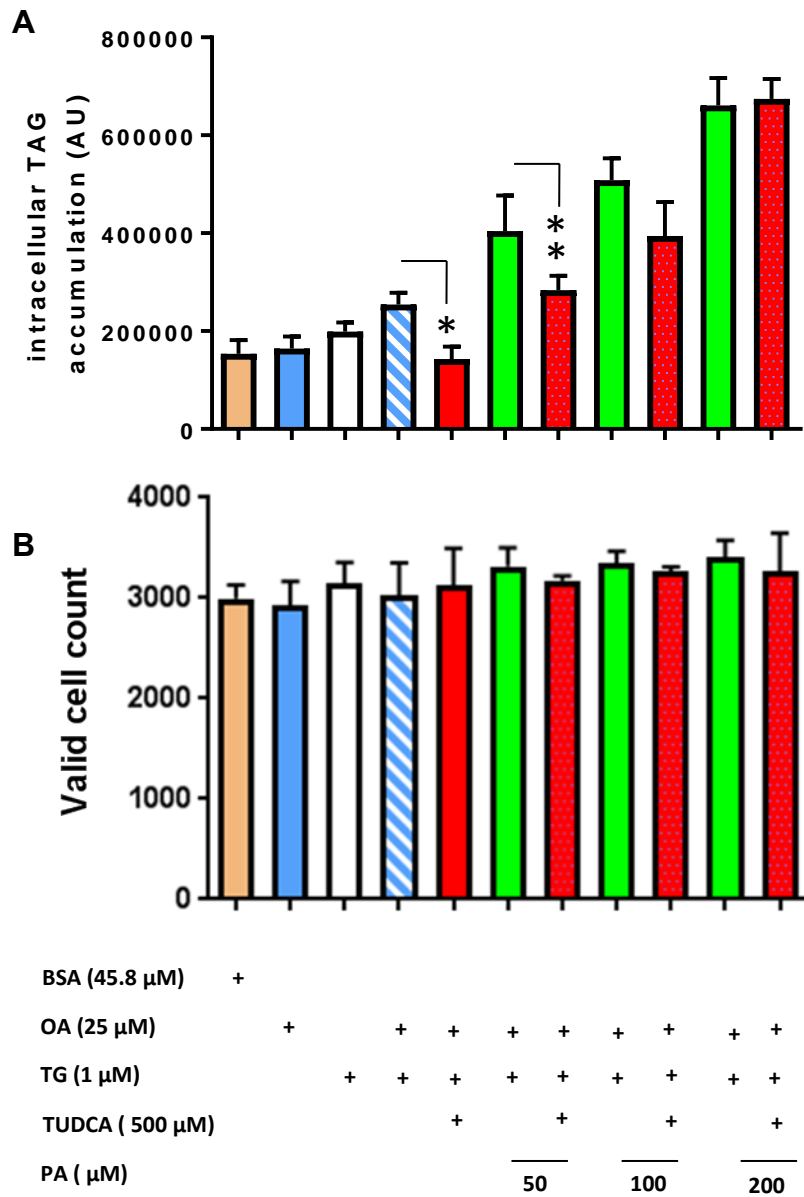

**Figure S5. Exposure to TUDCA reduces lipid accumulation.** (A) Lipid-uptake by the hiPSC-Hep treated with palmitic acid (50-200  $\mu$ M) and 25  $\mu$ M oleic acid and 1 $\mu$ M Thapsigargin mix in the presence (red bars) or absence (green bars) of TUDCA was assessed by Bodipy 493/503 staining. (B) Nuclei were stained with Hoechst dye (blue) for valid cell count. Data are mean $\pm$ s.d for two experimental determinations, each determined from the average of three wells and seven fields per well. \* $p \leq 0.03$ , \*\* $p \leq 0.009$ .

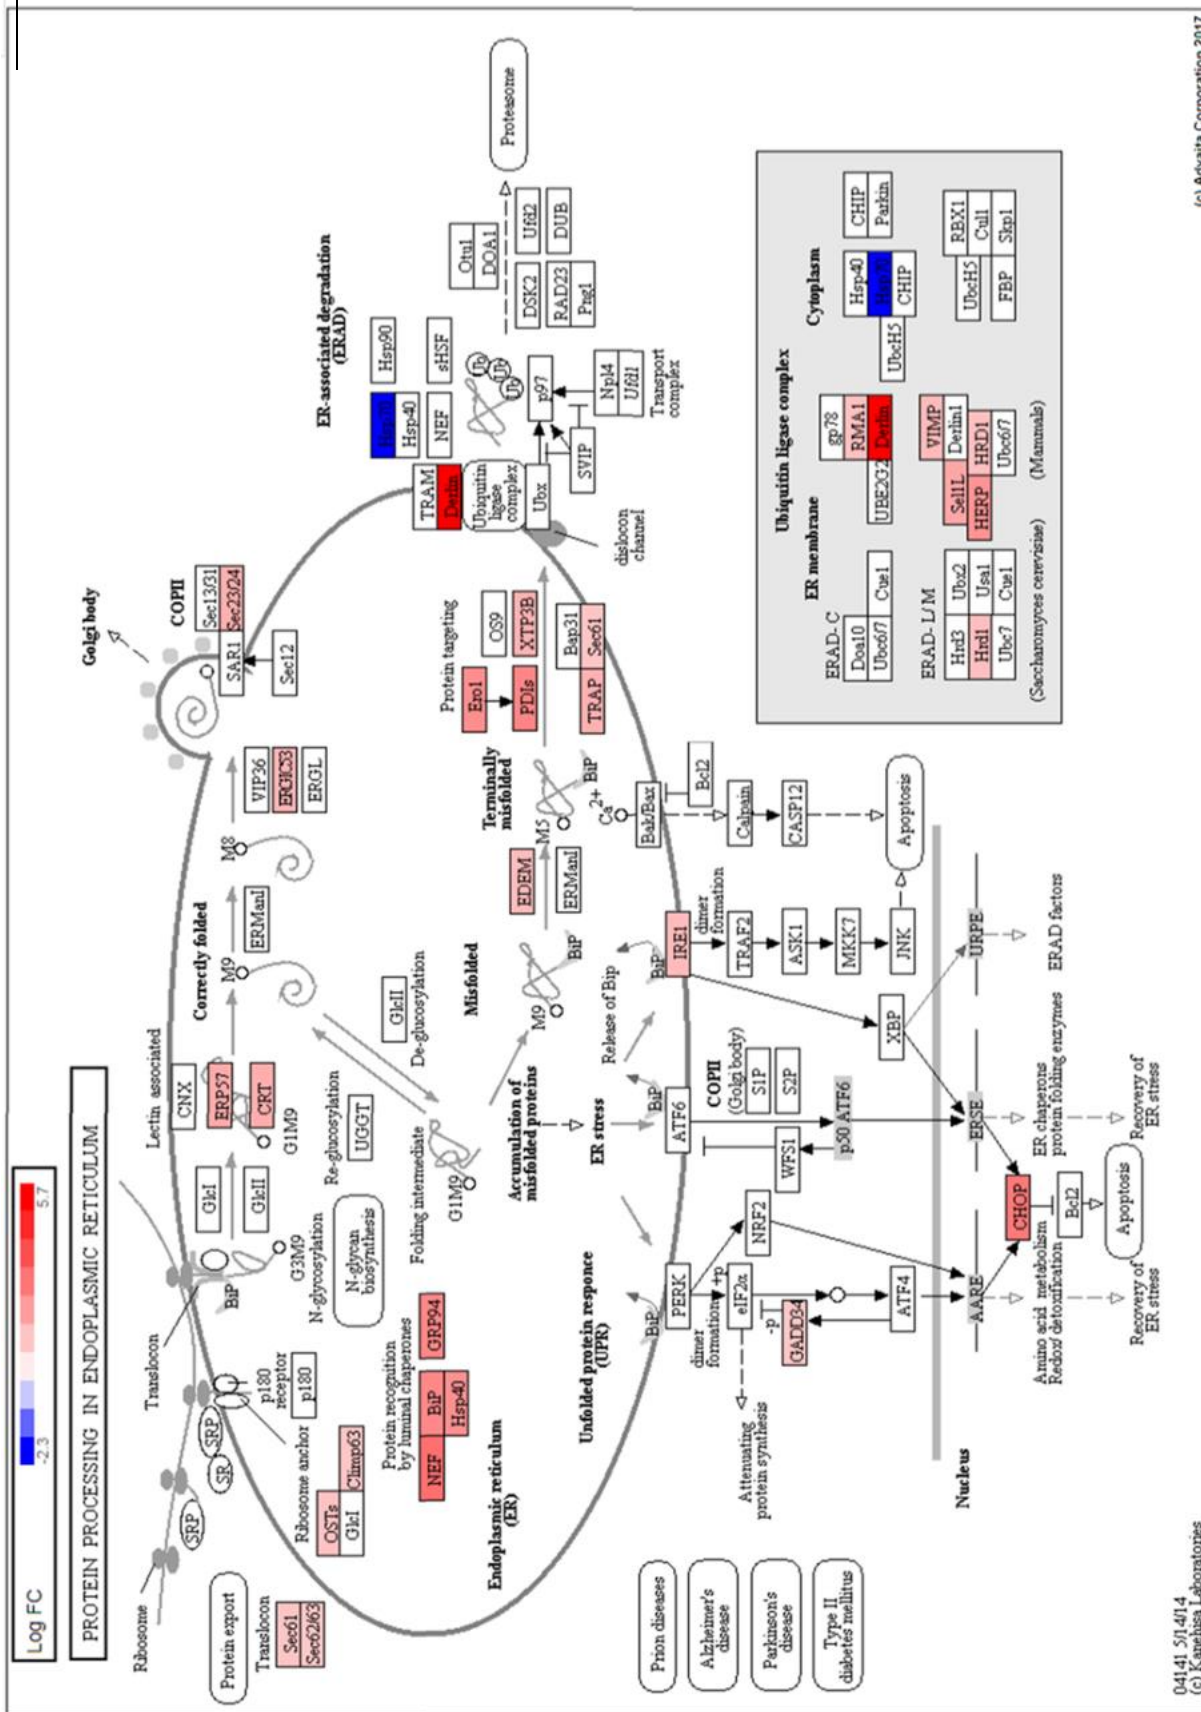



**Figure S6. Prediction of emergent biological relationships among genes and their pathways.** Kyoto Encyclopedia of Genes and Genomes database (KEGG) map of the canonical protein processing in ER pathway by iPathwayGuide during induced-ER stress in hiPSC-Hep. Blue and red colors indicate low to high perturbation and each gene is highlighted in all locations it occurs in the diagram. The original Protein processing in ER pathway was obtained from the freely available Kegg Pathway Database (<http://www.kegg.jp/kegg/pathway.html>).

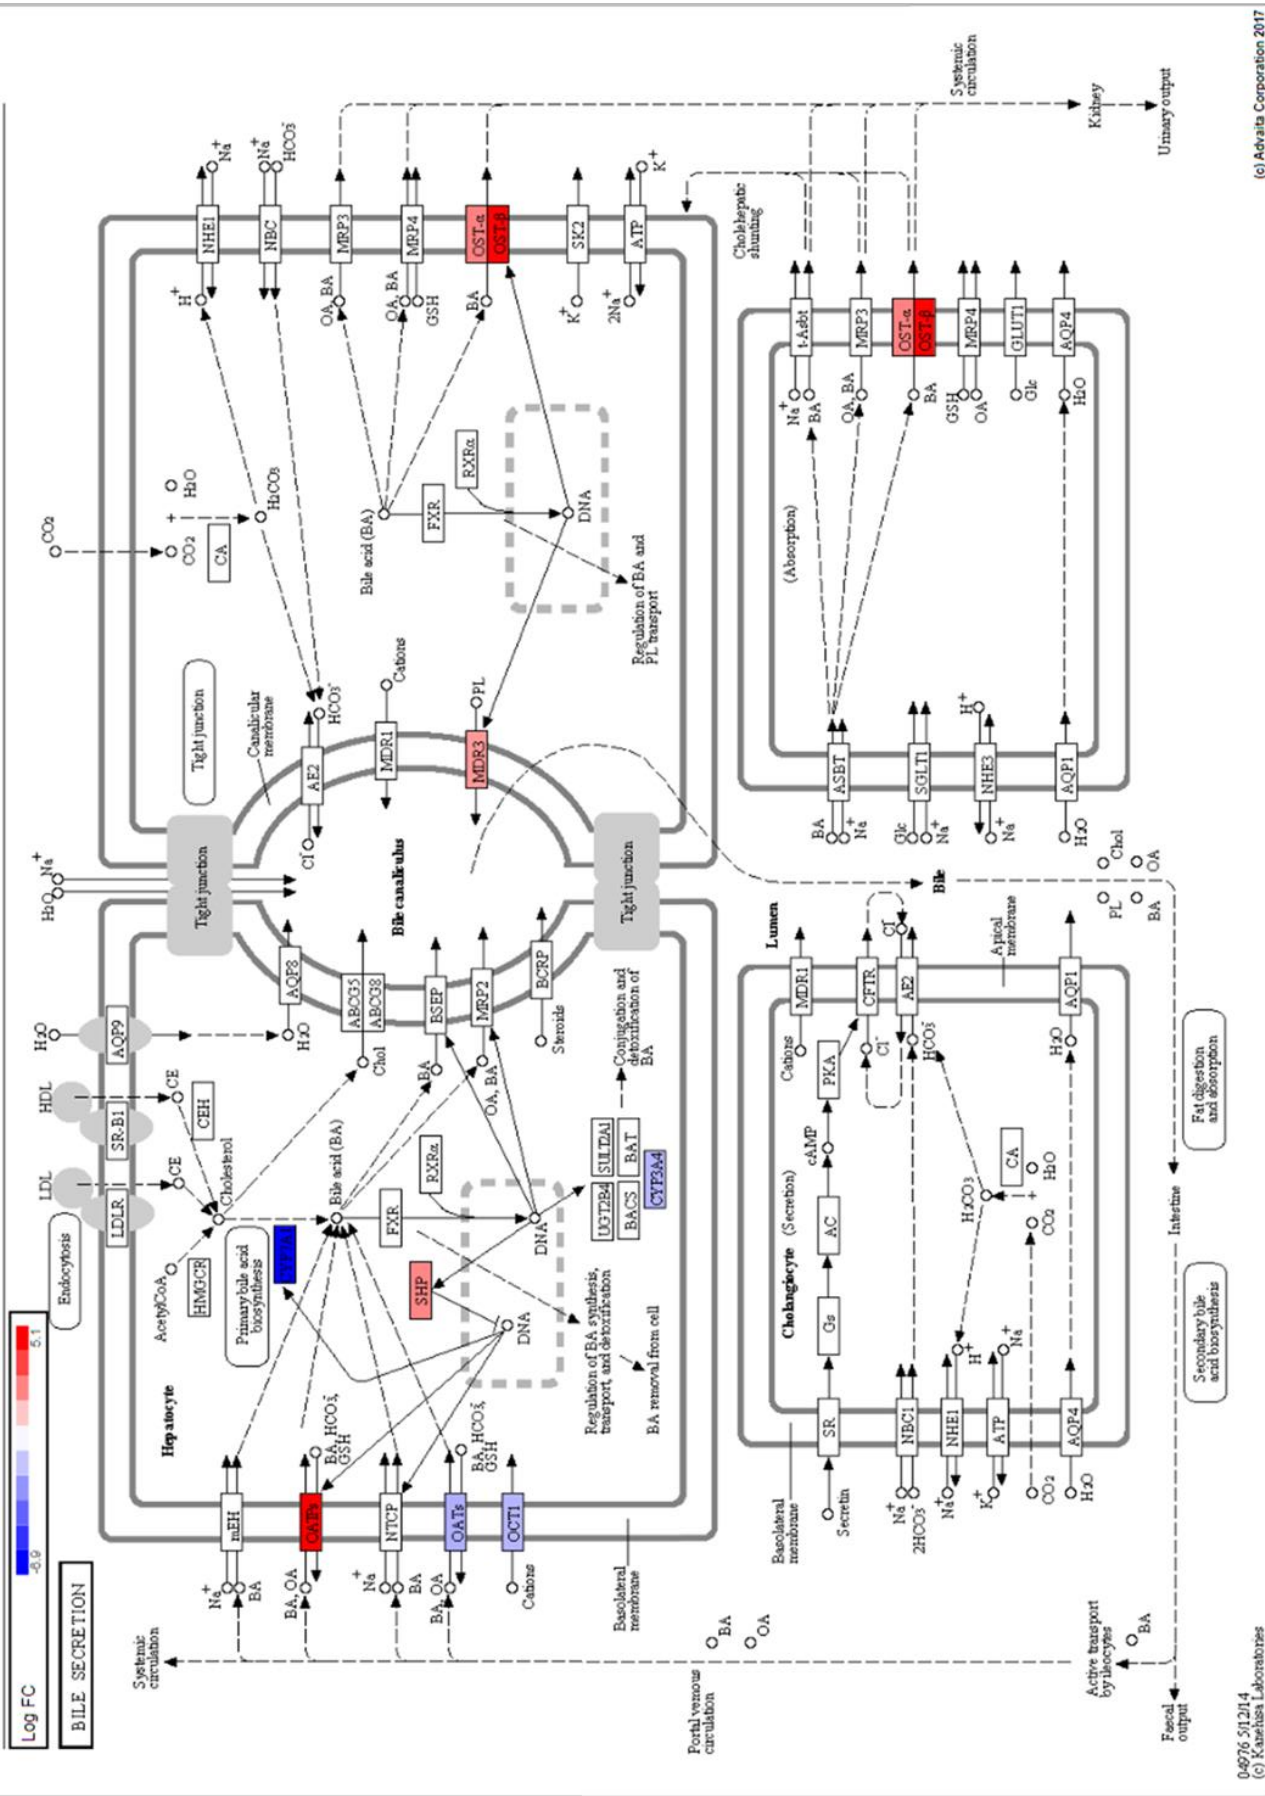

(c) Advaita Corporation 2017

040716 5/12/14  
(c) Kazuhisa Laboratories

**Figure S7.** KEGG map of the canonical Bile secretion pathway by iPathwayGuide after OCA-TG-FA treatment in hiPSC-Hep. Red and blue boxes are up- and down-regulated genes, respectively, in the data set of OCA-TG-FA vs TG-FA-treated cells group and each gene is highlighted in all locations it occurs in the diagram.
